# Supplementary material
Source: MDPI journal article supplement (https://www.mdpi.com/2073-4441/15/19/3457)
Supplement: s1 [file s1]

# SUPPLEMENTARY MATERIAL FOR

## Groundwater flow model along a vertical profile of the Sardas landfill in Sabiñánigo, Spain

Javier Samper <sup>1,\*</sup>, Brais Sobral <sup>1</sup>, Bruno Pisani <sup>1</sup>, Acacia Naves <sup>1</sup>, Joaquín Guadaño <sup>2</sup>, Jorge Gómez <sup>2</sup> and Jesús Fernández <sup>2</sup>

**Table S1.** Measured and calculated hydraulic heads in the boreholes located along the profile. The mean measured head is the average of the available data in each borehole. The residual is the difference between the calculated and the measured heads.

| Borehole                                                    | Mean measured head (m) | Computed steady-state head (m) | Residual (m) |
|-------------------------------------------------------------|------------------------|--------------------------------|--------------|
| SE21 - Reservoir                                            | 764.91                 | 764.96                         | 0.05         |
| PS26 - Gravels                                              | 765.06                 | 765.04                         | -0.01        |
| PS26B - Marls                                               | 765.02                 | 765.04                         | 0.02         |
| SPN5 - Gravels                                              | 765.05                 | 765.05                         | 0.00         |
| PS21 - Marls                                                | 765.04                 | 765.06                         | 0.02         |
| PS21B - Gravels                                             | 765.03                 | 765.06                         | 0.02         |
| PS14 - Gravels                                              | 765.10                 | 765.07                         | -0.03        |
| PS14L - Gravels                                             | 765.05                 | 765.07                         | 0.02         |
| PS19B - Gravels                                             | 765.10                 | 765.07                         | -0.03        |
| PS19C - Silts                                               | 767.79                 | 767.17                         | -0.63        |
| PS5D - Gravels                                              | 765.02                 | 765.07                         | 0.05         |
| PS5E - Silts                                                | 766.59                 | 766.44                         | -0.15        |
| PS5F - Silts                                                | 769.08                 | 769.47                         | 0.38         |
| PS5G - Gravels                                              | 765.07                 | 765.07                         | 0.00         |
| PS7C - Silts                                                | 772.87                 | 772.87                         | 0.00         |
| PS29 - Deep marls                                           | 773.89                 | 773.19                         | -0.70        |
| PS29B - Shallow marls                                       | 774.16                 | 773.91                         | -0.26        |
| PS29C - Wastes spread out                                   | 774.04                 | 774.64                         | 0.61         |
| S44D - Wastes spread out                                    | 778.45                 | 778.00                         | -0.44        |
| S37B - Landfill wastes                                      | 779.15                 | 779.67                         | 0.52         |
| S37 - Landfill wastes                                       | 787.29                 | 788.07                         | 0.78         |
| S39B - Landfill wastes                                      | 789.02                 | 789.36                         | 0.34         |
| S39M - Landfill wastes                                      | 792.13                 | 790.37                         | -1.76        |
| S39G - Landfill wastes                                      | 791.79                 | 791.27                         | -0.52        |
| S39L - Landfill wastes                                      | 792.10                 | 792.28                         | 0.19         |
| S39F - Landfill wastes                                      | 791.89                 | 793.30                         | 1.41         |
| S35E - Deep marls                                           | 802.15                 | 802.89                         | 0.74         |
| Average absolute residual                                   |                        |                                | 0.3592       |
| Root mean square error normalized by the standard deviation |                        |                                | 0.0486       |
| Nash-Sutcliffe index                                        |                        |                                | 0.9972       |

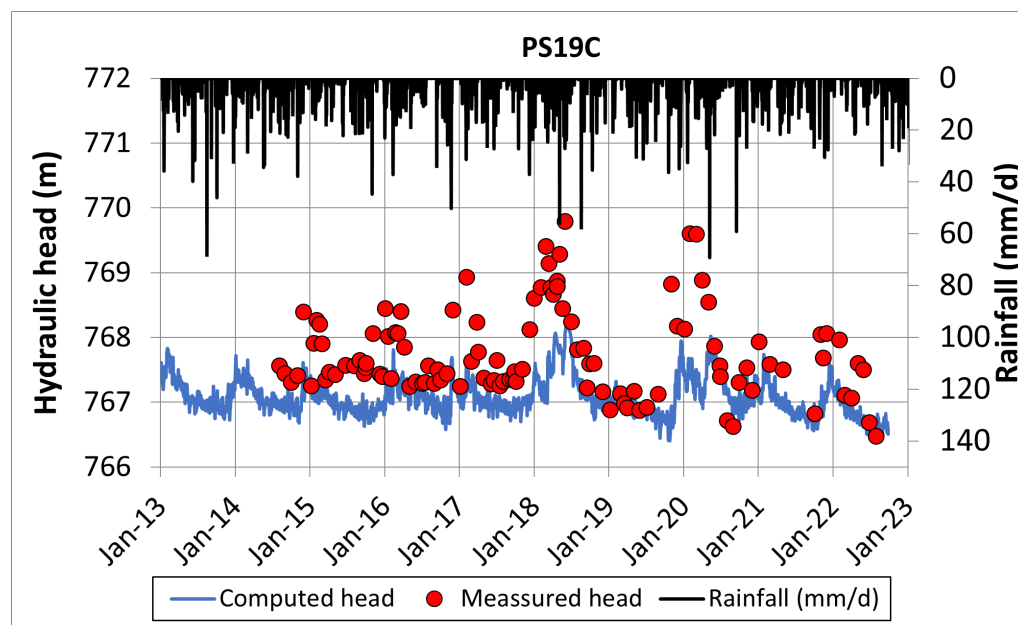

**Figure S1.** Measured and computed hydraulic heads (left axis) in borehole PS19C screened in silts and daily rainfall (right axis) from January 2013 to September 2022.

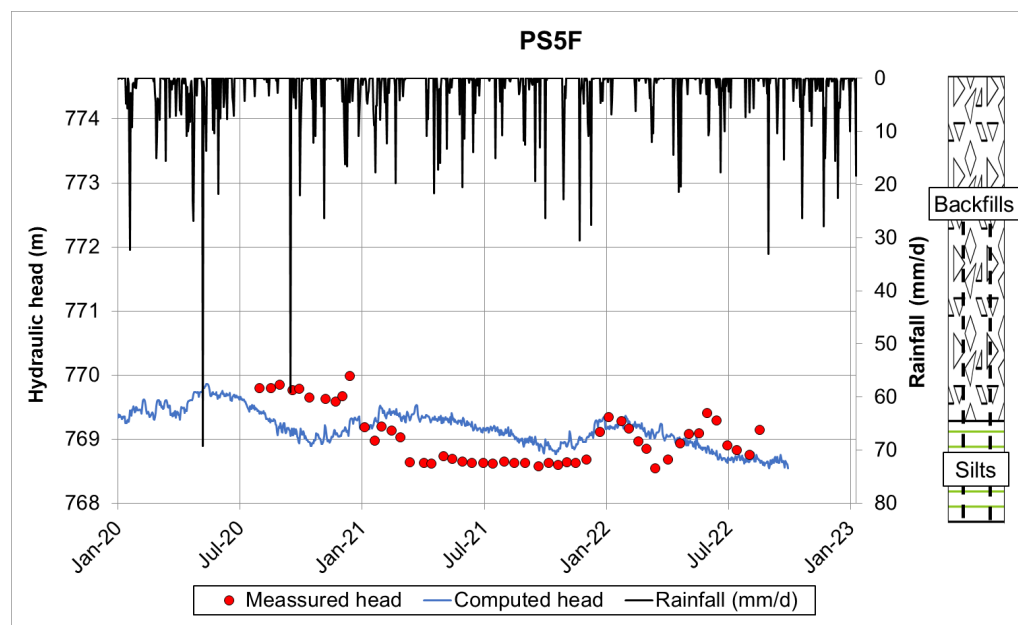

**Figure S2.** Measured and computed hydraulic heads (left axis) in borehole PS5F screened in backfill and daily rainfall (right axis) from January 2013 to September 2022. Also shown the schematic lithology of PS5F borehole. Dashed lines indicate the screened section of the borehole.
